# Supplementary material for: Electrically tunable liquid crystal terahertz phase shifter driven by transparent polymer electrodes
Source: Royal Society of Chemistry journal article supplement (doi:10.1039/c6tc00842a), 2016-01-01
Supplement: c6tc00842a1.pdf [file c6tc00842a1.pdf]

## Supplementary Information

### Electrically tunable liquid crystal terahertz phase shifter driven with polymer transparent electrodes

Yan Du, Hao Tian\*, Xuan Cui, Hao Wang, Zhong-Xiang Zhou\*

Department of Physics, Harbin Institute of Technology, Harbin 150001, China

\*E-mail: tianhao@hit.edu.cn, zhouzx@hit.edu.cn

Keywords: poly (3,4-ethylenedioxythiophene):poly (4-styrenesulfonate); terahertz;  
transparent electrode; liquid crystal; phase shifter

#### 1. Film morphology.

The surface morphology of 15 vol% DMSO-doped-PEDOT:PSS electrodes was investigated using atomic force microscopy (AFM) with Fig.S1 showing AFM height images of single layer films.

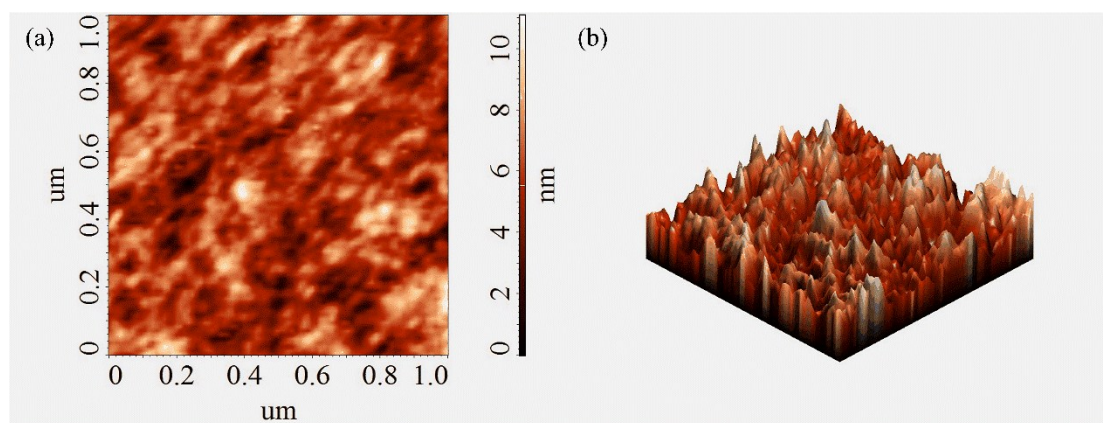

Fig. S1 2D and 3D AFM height images of 15 vol% DMSO-doped-PEDOT:PSS film.

#### 2. Transmittance of phase shifter with THz-TDS.

The THz transmittance of the phase shifter without bias voltage is shown in Fig. S2. The transmittance in the high-frequency range decreases sharply due to the absorption of THz wave by liquid crystal.  $T_0$  is the transmittance when voltage is zero. In order to better show the THz transmittance change with respect to the bias voltage, we plot  $T_v/T_0$  at THz frequencies (Fig. S3).  $T_v$  is the transmittance of phase shifter with different

voltages. For a voltage  $V > V_{th}$ , the LC molecules are essentially aligned with the electric field, thus leads to the transmittance change.

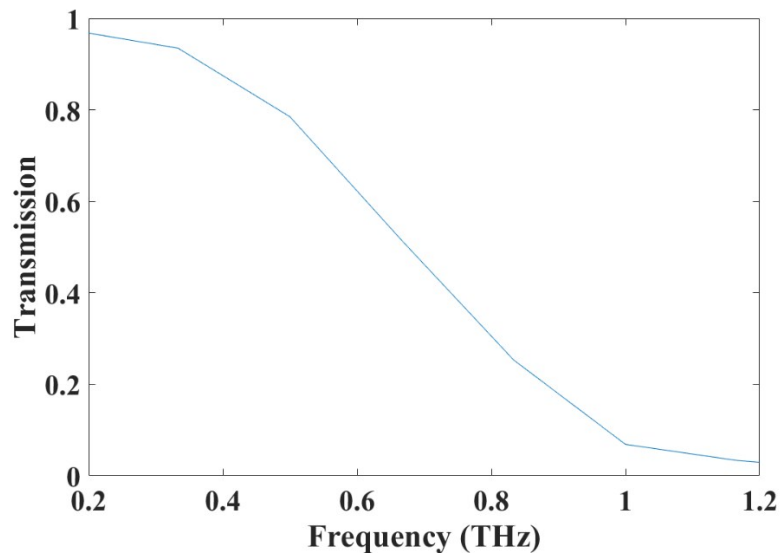

Fig. S2 THz transmittance of the phase shifter without bias voltage.

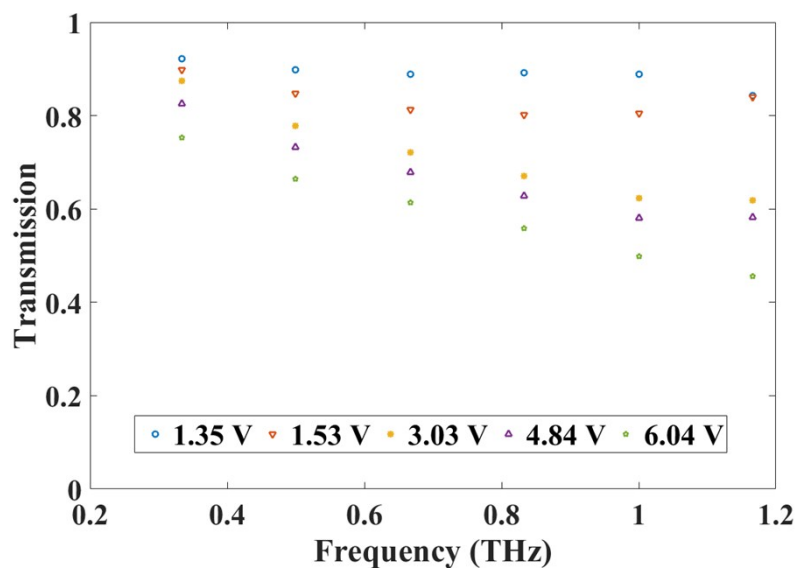

Fig. S3  $T_V/T_0$  as a function of THz frequencies at different voltages.
